# Supplementary material
Source: PubMed Central journal article supplement (PMC3993346)
Supplement: JB.01471-13_zjb999093096so1.pdf [file JB.01471-13_zjb999093096so1.pdf]

**TABLE S1 Primers for RACE and cloning**

| primer name          | primer sequence                         | use in this study                              | reference  |
|----------------------|-----------------------------------------|------------------------------------------------|------------|
| sinI-5'-RACE1        | ATCGGTGACCGTGACGATATGG                  | 5'-RACE of SMc00168                            | 50         |
| sinI-5'-RACE2        | ATGGTGACCTGGTTCGATGC                    | 5'-RACE of SMc00168                            | 50         |
| PsinI-H-fwd          | CCTAAAGCTTCAACGATTCTCGGCATATCC          | Construction of pLK64                          | 50         |
| PsinI-X-rev          | TCCTTCTAGAACCGTTTTCCGTTCACTATCCT        | Construction of pLK64                          | 50         |
| PsinI-X-revII        | GGCTCTAGACATTTTTTTCGCTCCATGCGT          | Construction of pLK60                          | This study |
| sinI-noTGA+ATG-X-rev | GATTCTAGACATGGCGGCGCGTGCCGTTTCAAGC      | Construction of pLK61                          | This study |
| PsinR-H-fwd          | TGCCAAGCTTCGCATATTCTGTGCGCGT            | Construction of pLK65                          | 50         |
| PsinR-X-rev          | CAAATCTAGACATGCCGTAACACCGAAAC           | Construction of pLK65                          | 50         |
| PcspA3-H-fwd         | TGCCAAGCTTGAAGACGCAATACCTCGTCA          | Construction of pLK002                         | 24         |
| PcspA3-X-rev         | CAAATCTAGACTCGGCCATGCGTCAGGT            | Construction of pLK002                         | 24         |
| PcspA3-219-rev       | ACAGTAAGAGTGATGGGTTT                    | Fusion primer for construction of pLKpLKrec01  | This study |
| PcspA3_msinI-fwd     | AAACCCATCACTCTTACTGTATCGCGTAATCACGCATGG | Fusion primer for construction of pLKpLKrec01  | This study |
| PsinI-29-rev         | GTAGCGATGCTGTCAGGCT                     | Fusion primer for construction of pLKpLK rec02 | This study |
| PsinI_mcspA3-fwd     | AGCCTGACAGCATCGCTACGTTCCGGCAATCTGCGA    | Fusion primer for construction of pLKpLKrec02  | This study |
| rne-NdeI-fwd         | CGCACATATGGCAGAGAAAATGCTTATC            | Construction of pBSrne and pWBrne              | This study |
| rne-XbaI-rev         | TGCTCTAGATTAGAAGAAACCGCGGCG             | Construction of pBSrne and pWBrne              | This study |
| rneT5stop-H-rev      | CATAAGCTTTCAATCTTCGTGCGGACTCCT          | Construction of pWBrne675 and pK1123-2024      | This study |
| rne-B-1123-fwd       | ATCGGATCCCTCTACAACAAGGACATCAGCGA        | Construction of pK1123-2024                    | This study |
| rne-E-79-fwd         | GAAGAATTGATTTTCAATCGG                   | Construction of pK79-926                       | This study |
| rne-B-926-rev        | ATCGGATCCGCGATCTCCTTCAGACGCTT           | Construction of pK79-926                       | This study |

**TABLE S2 Primer pairs for qRT-PCR analysis**

| target gene                                         | forward strand       | reverse strand       | primer pair efficiency or reference |
|-----------------------------------------------------|----------------------|----------------------|-------------------------------------|
| SMc00170; <i>sinR</i>                               | CTGGATATCGTGGAATATGG | GGGTGCATCCTGTAAAGC   | 1.951                               |
| SMc00168, <i>sinI</i> , amplification of bp 4-251   | TCAGGATAGTGAACGGAAA  | GTATCGTCCAGCATATTCG  | 1.933                               |
| SMc00168, <i>sinI</i> , amplification of bp 232-434 | AATATGCTGGACGATACGTT | GTGACGATATGGCTGATG   | 1.856                               |
| SMc01336, <i>rne</i> , upstream of mini-Tn5         | ACATCATCATCAACCAGACC | AGGCAATCCTTTAGCTTCTT | 1.924                               |
| SMc01336, <i>rne</i> , downstream of mini-Tn5       | CGAGAGTGTCGATGAAGAAG | CCCTTTTTGGGTTTTGTC   | 1.908                               |
| SMc01317, <i>rpoB</i>                               | ATCCTCGACACCTTCTACAC | GATAGTTGCCGTAGAGATCG | 1.987                               |
| SMc03224, <i>16S</i>                                | TCTACGGAATAACGCAGG   | GTGTCTCAGTCCCAATGT   | ref. 55                             |

| Culture Nr. | Strain                   | IPTG | Position \ time (min) | +1 | +20 | +24 | +114 | +117 | +133 | +219 | +239 | +243 | +262 | +268 | +284 | +295 | +297 | +306 | +313 | +330 | +326 | +332 | +337 | +338 | +357 | +359 |
|-------------|--------------------------|------|-----------------------|----|-----|-----|------|------|------|------|------|------|------|------|------|------|------|------|------|------|------|------|------|------|------|------|
| 1           | 2011                     | -    | -                     | 9  |     | 6   |      |      |      |      |      |      |      |      | 1    |      |      |      |      |      |      |      |      |      |      | 8    |
| 2           | 2011                     | +    | 60                    | 12 |     | 5   |      |      |      |      |      |      |      |      |      |      |      |      |      |      |      | 1    |      |      |      | 6    |
| 3           | 2011 (pWBrne)            | -    | -                     | 4  | 2   | 2   |      |      | 2    |      |      |      | 2    |      |      |      |      |      |      |      | 2    |      |      |      |      |      |
| 4           | 2011 (pWBrne)            | +    | 20                    |    |     | 1   |      |      |      | 1    |      |      |      |      |      |      |      |      |      |      |      |      |      |      |      |      |
|             | 2011 (pWBrne)            | +    | 40                    |    |     | 2   |      | 2    |      |      |      |      |      |      |      |      |      | 1    |      |      |      |      |      | 1    | 1    |      |
|             | 2011 (pWBrne)            | +    | 60                    |    |     |     | 1    |      |      |      |      |      | 1    |      |      | 1    |      |      |      |      |      |      |      |      |      | 1    |
| 5           | 2011 (pWBrne)            | -    | -                     | 6  |     | 2   |      |      |      |      |      |      |      | 1    |      |      |      |      |      |      |      |      |      |      |      |      |
| 6           | 2011 (pWBrne)            | +    | 20                    |    |     | 3   |      |      |      |      |      |      |      |      |      |      |      |      |      |      |      |      |      |      |      |      |
|             | 2011 (pWBrne)            | +    | 40                    |    |     |     |      |      |      |      |      |      |      |      |      |      |      |      | 2    |      |      |      |      |      |      |      |
|             | 2011 (pWBrne)            | +    | 60                    |    |     |     |      |      |      |      |      |      |      |      |      |      |      |      |      |      |      | 1    | 2    | 1    |      |      |
| 7           | <i>rne::Tn5</i> (pWBrne) | -    | -                     | 15 |     |     |      |      |      |      |      |      |      |      |      |      |      |      |      |      |      |      |      |      |      |      |
| 8           | <i>rne::Tn5</i> (pWBrne) | +    | 20                    | 3  |     |     |      |      |      |      |      |      |      |      |      |      |      |      |      |      |      |      |      |      |      |      |
|             | <i>rne::Tn5</i> (pWBrne) | +    | 40                    | 3  |     | 2   |      |      |      |      | 1    |      |      |      |      |      |      |      |      |      |      |      |      |      |      |      |
|             | <i>rne::Tn5</i> (pWBrne) | +    | 60                    | 3  |     | 1   |      |      |      |      |      |      |      |      |      |      |      |      |      |      |      |      |      |      |      |      |
| 9           | <i>rne::Tn5</i> (pWBrne) | -    | -                     | 9  |     |     |      |      |      |      |      |      |      |      |      |      |      |      |      |      |      |      |      |      |      |      |
| 10          | <i>rne::Tn5</i> (pWBrne) | +    | 20                    | 3  |     |     |      |      |      |      |      |      |      |      |      |      |      |      |      |      |      |      |      |      |      |      |
|             | <i>rne::Tn5</i> (pWBrne) | +    | 40                    | 3  |     | 3   |      |      |      |      |      |      |      |      |      |      |      |      |      |      |      |      |      |      |      |      |
|             | <i>rne::Tn5</i> (pWBrne) | +    | 60                    |    |     |     |      |      |      |      |      | 2    |      |      |      |      |      |      |      |      |      |      |      |      |      | 2    |

**Table S3. The results of all 5'-RACE experiments in detail.** For the determination of 5'-ends of RNA by 5'-RACE *S. meliloti* cells were grown in TY medium to an OD<sub>600</sub> of 1.0. Ectopic expression of *rne* was induced by addition of 1 mM IPTG. Cells were harvested 20 min, 40 min, and 60 min after induction. No IPTG was added to the control cultures. RNA was isolated and 5'-RACE analysis of *sinI* was performed. Given is the number of the clones corresponding to a certain position in the *sinI* transcript (+1 is the transcriptional start site, +24 is the putative RNase E cleavage site between the Shine-Dalgarno sequence and the start codon). Results are listed separately for each independent culture. For cultures with IPTG, the results are shown in a time resolution manner.
